# Supplementary material
Source: HighWire-hosted journal article supplement (https://bmjopen.bmj.com/content/15/4/e091049)
Supplement: inline-supplementary-material-1 [file inline-supplementary-material-1.pdf]

## Additional file 1: COREQ 32---ITEM CHECKLIST

| No. Item                                      | Guide questions/description                                            | Reported on Page #                       |
|-----------------------------------------------|------------------------------------------------------------------------|------------------------------------------|
| Domain 1: Research team and reflexivity       |                                                                        |                                          |
| 1. Inter viewer/facilitator                   | Which author/s conducted the interview?                                | Page # 5 (Data Collection)               |
| 2. Credentials                                | What were the researcher's credentials?                                | Page # 5 (Data Collection)               |
| 3. Occupation                                 | What was their occupation at the time of the study?                    | Page # 5 (Data Collection)               |
| 4. Gender                                     | Was the researcher male or female?                                     | Page # 5 (Data Collection )              |
| 5. Experience and training                    | What experience or training did the researcher have?                   | Page # 5 (Data Collection )              |
| 6. Relationship with participants established | Was a relationship established prior to study commencement?            | Page # 4 (Study recruitment and setting) |
| 7. Participant knowledge of the interviewer   | What did the participants know about the researcher?                   | Page # 4 (Study recruitment and setting) |
| 8. Interviewer characteristics                | What characteristics were reported about the inter viewer/facilitator? | Page # 5 (Data Collection)               |
| Domain 2: study design                        |                                                                        |                                          |
| 9. Methodological orientation and Theory      | What methodological orientation was stated to underpin the study?      | Page # 3 (Study Design)                  |
| 10. Sampling                                  | How were participants selected?                                        | Page # 5 (Data Collection)               |
| 11. Method of approach                        | How were participants approached?                                      | Page # 4 (Study recruitment and setting) |
| 12. Sample size                               | How many participants were in the study?                               | Page # 5 (Data Collection)               |
| 13. Non---participation                       | How many people refused to participate or dropped out? Reasons?        | NA                                       |
| 14. Setting of data collection                | Where was the data collected?                                          | Page # 4 (Study recruitment and setting) |
| 15. Presence of non---participants            | Was anyone else present besides the participants and researchers?      | NA                                       |
| 16. Description of sample                     | What are the important characteristics of the sample?                  | NA                                       |
| 17. Interview guide                           | Were questions, prompts, guides provided by the authors?               | In-Depth Interview Guide                 |
| 18. Repeat interviews                         | Were repeat interviews carried out?                                    | No                                       |
| 19. Audio/visual recording                    | Did the research use audio or visual recording to collect the data?    | Page # 5 (Data Collection)               |
| 20. Field notes                               | Were field notes made during and/or                                    | Page # 5 (Data Collection)               |

|                                    |                                                                                                         |                            |
|------------------------------------|---------------------------------------------------------------------------------------------------------|----------------------------|
|                                    | after the interview?                                                                                    |                            |
| 21. Duration                       | What was the duration of the interviews                                                                 | Page # 5 (Data Collection) |
| 22. Data saturation                | Was data saturation discussed?                                                                          | Page # 5 (Data Collection) |
| 23. Transcripts returned           | Were transcripts returned to participants for comment and/or correction?                                | No                         |
| Domain 3: analysis and findings    |                                                                                                         |                            |
| 24. Number of data coders          | How many data coders coded the data?                                                                    | Page # 5 (Data Analysis)   |
| 25. Description of the coding tree | Did authors provide a description of the coding tree?                                                   | NA                         |
| 26. Derivation of themes           | Were themes identified in advance or derived from the data?                                             | Page # 5 (Data Analysis)   |
| 27. Software                       | What software, if applicable, was used to manage the data?                                              | NA                         |
| 28. Participant checking           | Did participants provide feedback on the findings?                                                      | No                         |
| 29. Quotations presented           | Were participant quotations presented to illustrate the themes/findings? Was each quotation identified? | NA                         |
| 30. Data and findings consistent   | Was there consistency between the data presented and the findings?                                      | NA                         |
| 31. Clarity of major themes        | Were major themes clearly presented in the findings?                                                    | NA                         |
| 32. Clarity of minor themes        | Is there a description of diverse cases or discussion of minor themes?                                  | NA                         |
